# Supplementary material
Source: publisher site journal article supplement (https://www.dovepress.com/article/328132)
Supplement: Supplementary file 1 [file get_supplementary_file.php]

**Supporting Information for**

**(*2Z*)-3-hydroxy-3-(4-R-phenyl)-prop-2-enedithioic acids as new antituberculosis compounds.**

Gustavo Pretelín-Castillo1, Mayra Silva Miranda2, Clara Espitia3, Rosa María Chávez-Santos1, Abel Suárez-Castro4, Luis Chacón-García4, Rodrigo Aguayo-Ortiz5, and Roberto Martínez1,*

1 Instituto de Química, Universidad Nacional Autónoma de México, Circuito Exterior, Ciudad Universitaria, 04510, Cd. México, México

2 Catedrática CONACYT adscrita al Instituto de Investigaciones Biomédicas, Universidad Nacional Autónoma de México, Ciudad Universitaria, 04510, Cd. México, México

3 Instituto de Investigaciones Biomédicas Departamento de Inmunología, Universidad Nacional Autónoma de México, Ciudad Universitaria, 04510, Cd. México, México

4 Instituto de Investigaciones Químico-Biológicas, Universidad Michoacana de San Nicolás de Hidalgo, Edificio B-1, Ciudad Universitaria, 58030, Morelia Michoacán, México

5 Departamento de Farmacia, Facultad de Química, Universidad Nacional Autónoma de México, Circuito Exterior, Ciudad Universitaria, 04510, Cd. México, México.

✉ Roberto Martínez

[robmar@unam.mx](mailto:robmar@unam.mx)

Spectral Data


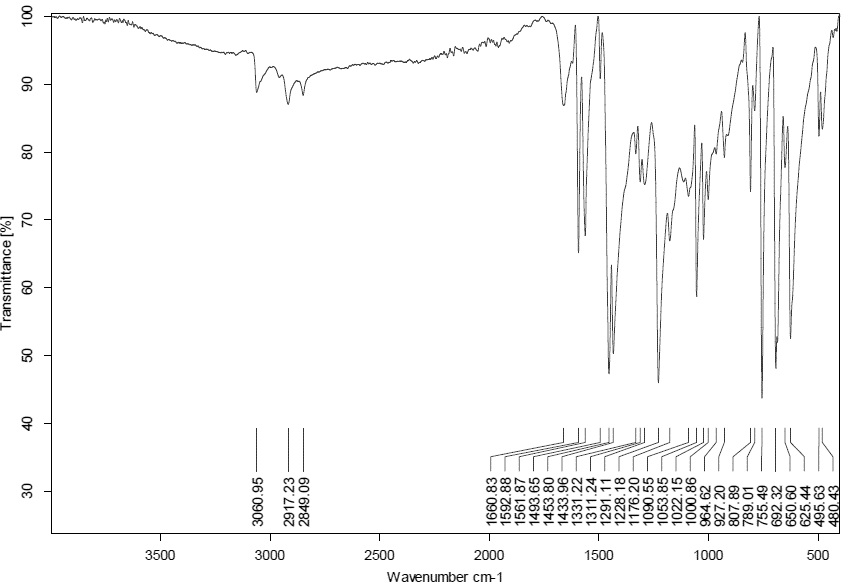


**Figure 1**. IR (ATR) spectra of (2Z)-3-hydroxy-3-phenylprop-2-enedithioic acid **(11a)**

**Figure 2**. 1H NMR (300 MHz, CDCl3) of (2Z)-3-hydroxy-3-phenylprop-2-enedithioic acid **(11a)**

**Figure 3**. 13C NMR (75 MHz, CDCl3) of (2Z)-3-hydroxy-3-phenylprop-2-enedithioic acid **(11a)**


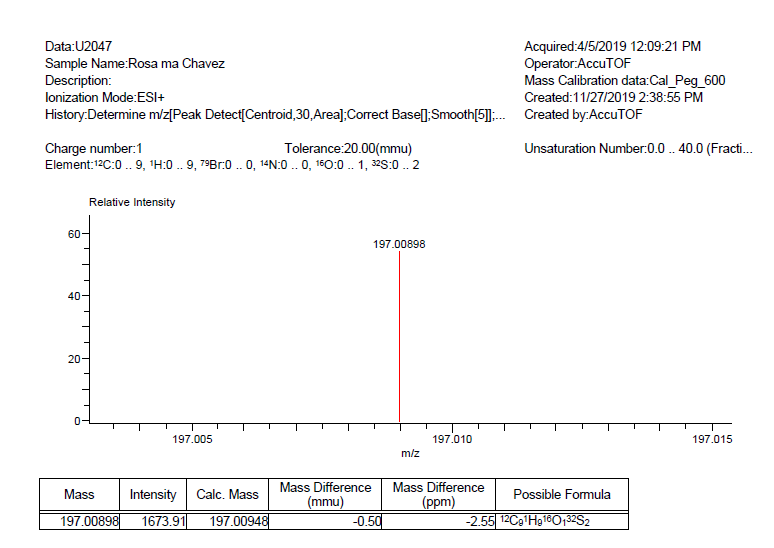


**Figure 4**. High Resolution Mass Spectra of (2Z)-3-hydroxy-3-phenylprop-2-enedithioic acid **(11a)**


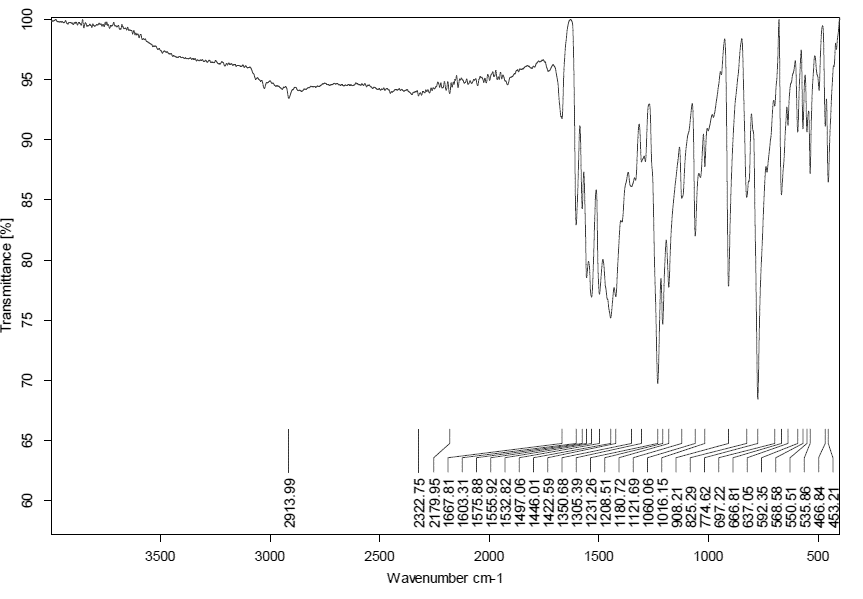


**Figure 5**. IR (ATR) spectra of (Z)-3-hydroxy-3-(p-methylphenyl)-prop-2-enedithioic acid **(11b)**

**Figure 6**. 1H NMR (300 MHz, CDCl3) of (Z)-3-hydroxy-3-(p-methylphenyl)-prop-2-enedithioic acid **(11b)**

**Figure 7**. 13C NMR (75 MHz, CDCl3) of (Z)-3-hydroxy-3-(p-methylphenyl)-prop-2-enedithioic acid **(11b)**


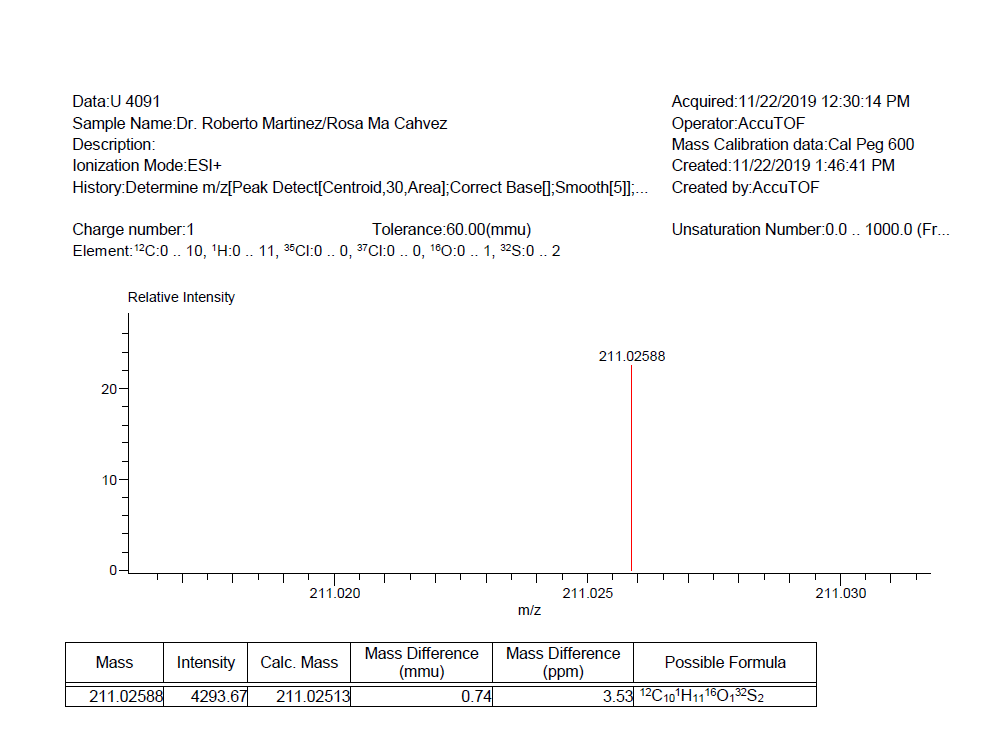


**Figure 8**. High Resolution Mass Spectra of (Z)-3-hydroxy-3-(p-methylphenyl)-prop-2-enedithioic acid **(11b)**


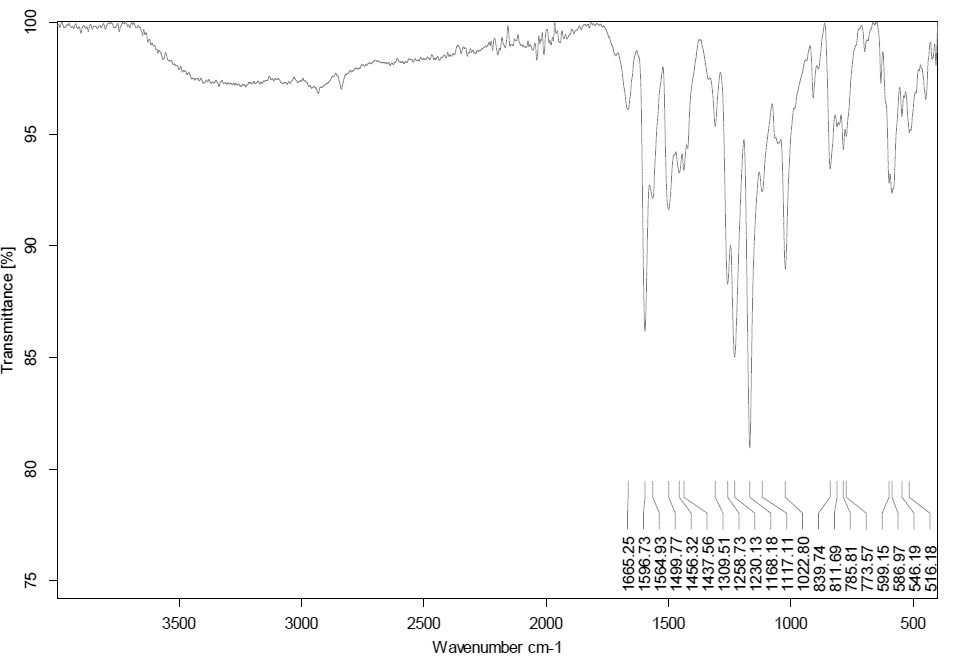


**Figure 9**. IR (ATR) spectra of (2Z)-3-hydroxy-3-(4-methoxyphenyl)-prop-2-enedithioic acid **(11c)**

**Figure 10.** 1H NMR (300 MHz, CDCl3) of(2Z)-3-hydroxy-3-(4-methoxyphenyl)-prop-2-enedithioic acid **(11c)**

**Figure 11**. 13C NMR (75 MHz, CDCl3) of (2Z)-3-hydroxy-3-(4-methoxyphenyl)-prop-2-enedithioic acid **(11c)**


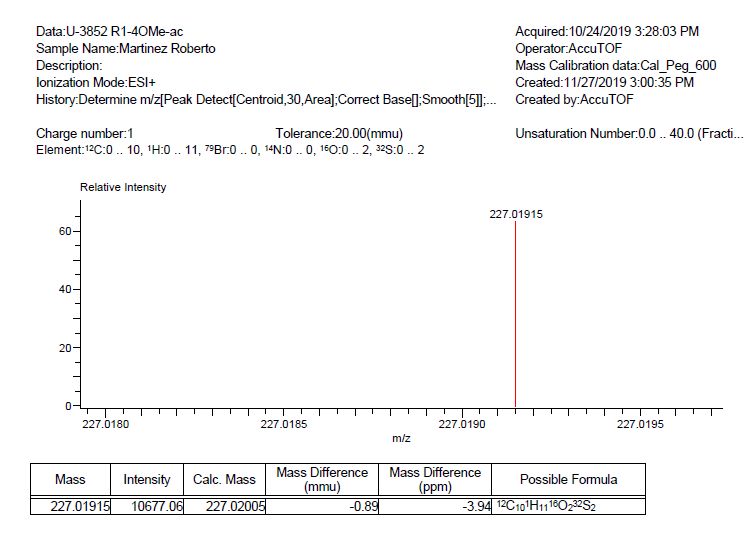


**Figure 12**. High Resolution Mass Spectra of (2Z)-3-hydroxy-3-(4-methoxyphenyl)-prop-2-enedithioic acid **(11c)**


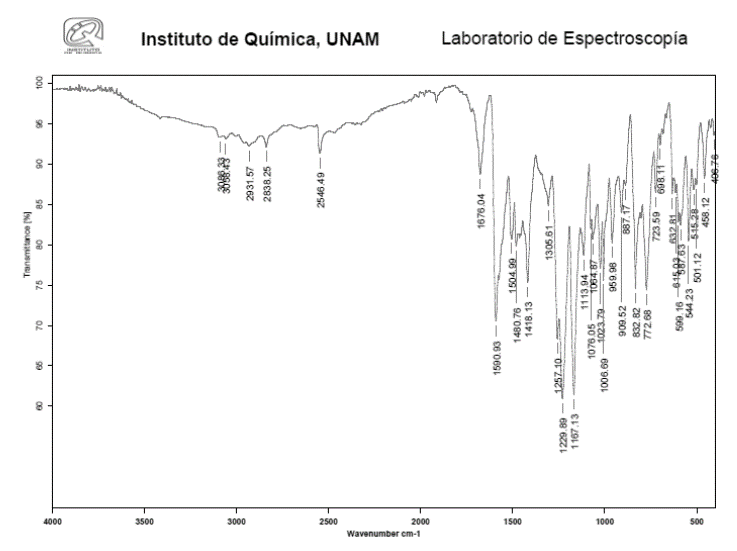


**Figure 13**. IR (ATR) spectra of (2Z)-3-hydroxy-3-(4-hydroxyphenyl)-prop-2-enedithioic acid **(11d)**

**Figure 14**. 1H NMR (300 MHz, CDCl3) of (2Z)-3-hydroxy-3-(4-hydroxyphenyl)-prop-2-enedithioic acid **(11d)**

**Figure 15**. 13C NMR (75 MHz, CDCl3) of (2Z)-3-hydroxy-3-(4-hydroxyphenyl)-prop-2-enedithioic acid **(11d)**


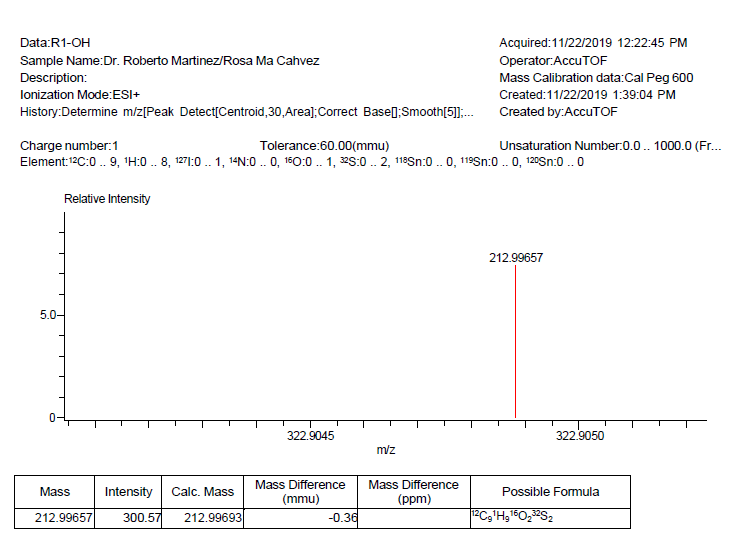


**Figure 16**. High Resolution Mass Spectra of (2Z)-3-hydroxy-3-(4-hydroxyphenyl)-prop-2-enedithioic acid **(11d)**


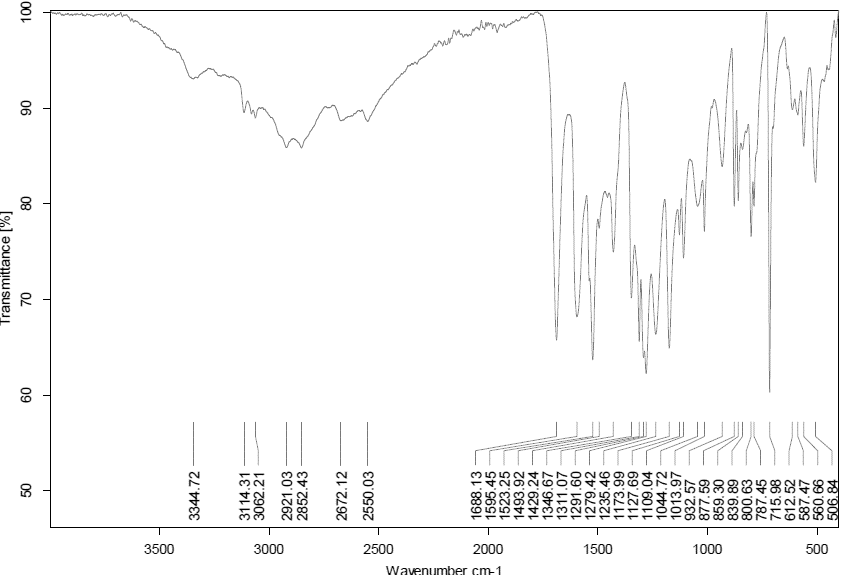


**Figure 17.** IR (ATR) spectra of (2Z)-3-hydroxy-3-(4-nitrophenyl)-prop-2-enedithioic acid (**11e**)

**Figure 18.** 1H NMR (300 MHz, CDCl3) of (2Z)-3-hydroxy-3-(4-nitrophenyl)-prop-2-enedithioic acid (**11e**)

**Figure 19.** 13C NMR (75 MHz, CDCl3) of (2Z)-3-hydroxy-3-(4-nitrophenyl)-prop-2-enedithioic acid (**11e**)


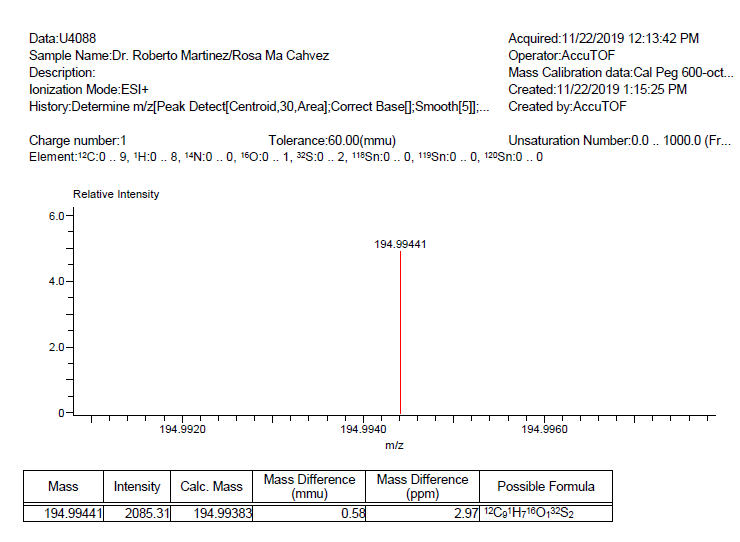


**Figure 20.** High Resolution Mass Spectra of (2Z)-3-hydroxy-3-(4-nitrophenyl)-prop-2-enedithioic acid (**11e**)


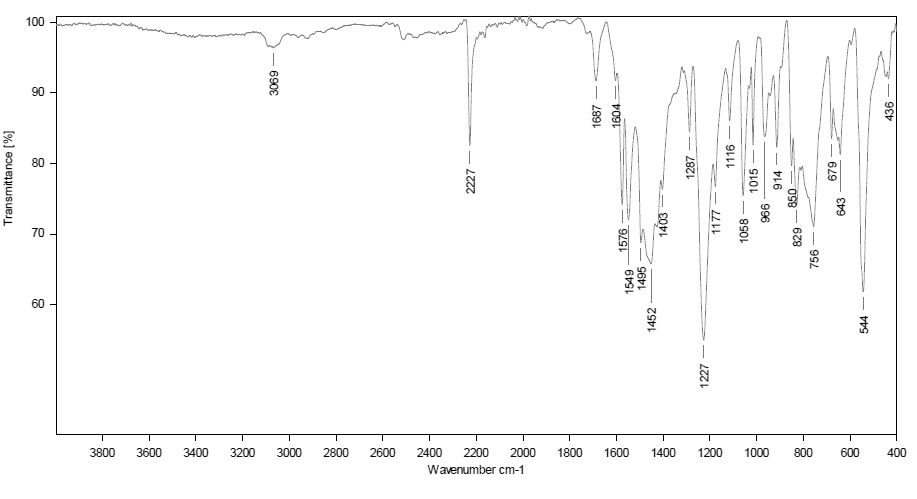


**Figure 21.** IR (ATR) spectra of (2Z)-3-(4-cyanophenyl)-3-hydroxyprop-2-enedithioic acid **(11f)**

**Figure 22.** 1H NMR (300 MHz, CDCl3) of (2Z)-3-(4-cyanophenyl)-3-hydroxyprop-2-enedithioic acid **(11f)**

**Figure 23**. 13C NMR (75 MHz, CDCl3) of (2Z)-3-(4-cyanophenyl)-3-hydroxyprop-2-enedithioic acid **(11f)**


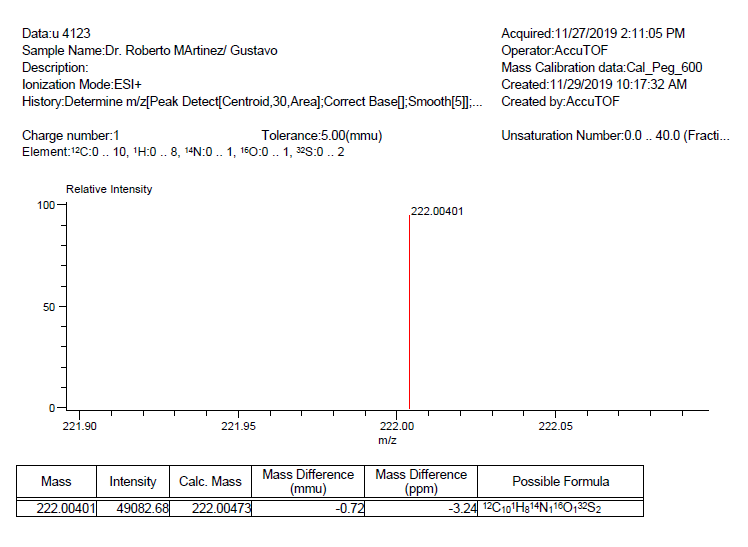


**Figure 24.** High Resolution Mass Spectra of (2Z)-3-(4-cyanophenyl)-3-hydroxyprop-2-enedithioic acid **(11f)**


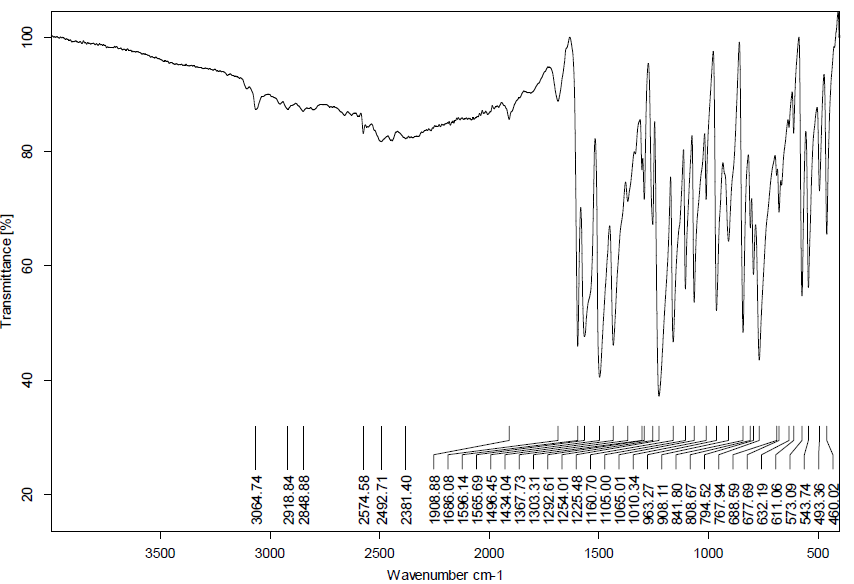


**Figure 25**. IR (ATR) spectra of (2Z)-3-(4-fluorophenyl)-3-hydroxyprop-2-enedithioic acid (**11g**)

**Figure 26.** 1H NMR (300 MHz, CDCl3) of (2Z)-3-(4-fluorophenyl)-3-hydroxyprop-2-enedithioic acid (**11g**)

**Figure 27.** 13C NMR (75 MHz, CDCl3) of (2Z)-3-(4-fluorophenyl)-3-hydroxyprop-2-enedithioic acid (**11g**)


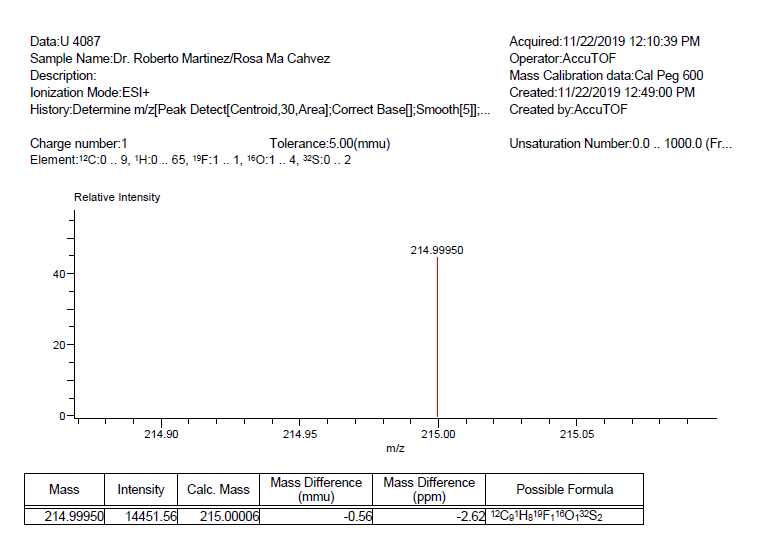


**Figure 28.** High Resolution Mass Spectra of (2Z)-3-(4-fluorophenyl)-3-hydroxyprop-2-enedithioic acid (**11g**)


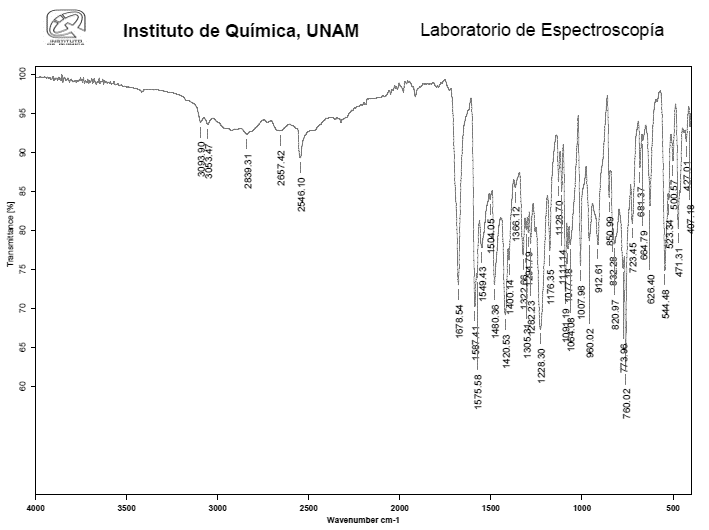


**Figure 29.** IR (ATR) spectra of (2Z)-3-(4-chlorophenyl)-3-hydroxyprop-2-enedithioic acid (**11h**)

**Figure 30.** 1H NMR (300 MHz, CDCl3) of (2Z)-3-(4-chlorophenyl)-3-hydroxyprop-2-enedithioic acid (**11h**)

**Figure 31.** 13C NMR (75 MHz, CDCl3) of (2Z)-3-(4-chlorophenyl)-3-hydroxyprop-2-enedithioic acid **(11h)**


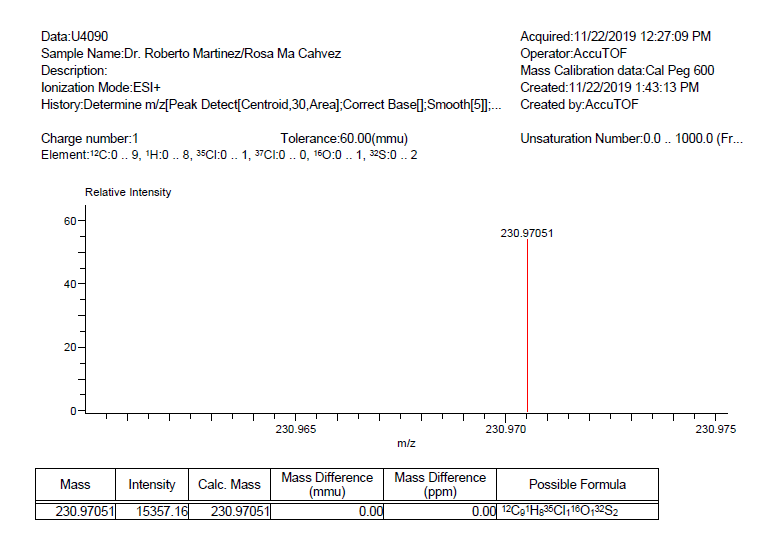


**Figure 32.** High Resolution Mass Spectra of (2Z)-3-(4-chlorophenyl)-3-hydroxyprop-2-enedithioic acid **(11h)**


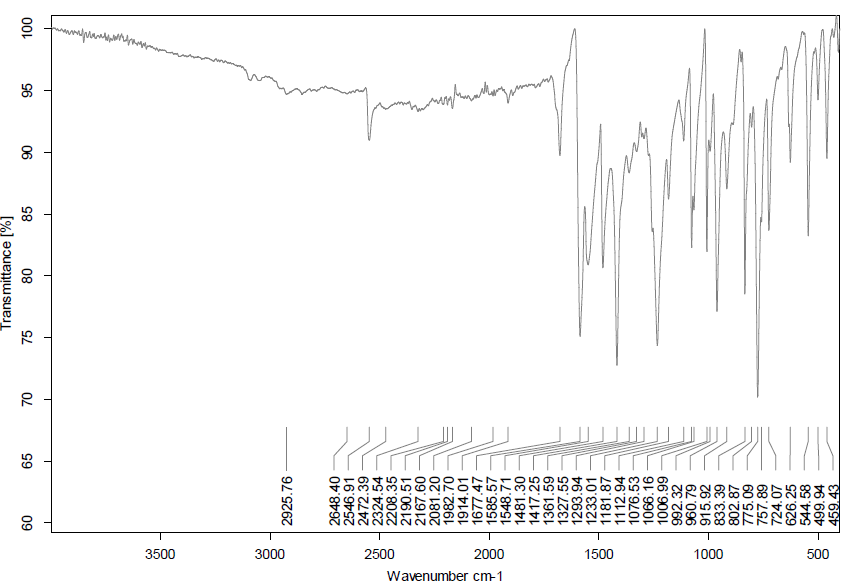


**Figure 33.** IR (ATR) spectra of (2Z)-3-(4-bromophenyl)-3-hydroxyprop-2-enedithioic acid **(11i)**

**Figure 34.** 1H NMR (300 MHz, CDCl3) of (2Z)-3-(4-bromophenyl)-3-hydroxyprop-2-enedithioic acid **(11i)**

**Figure 35.** 13C NMR (75 MHz, CDCl3) of (2Z)-3-(4-bromophenyl)-3-hydroxyprop-2-enedithioic acid **(11i)**


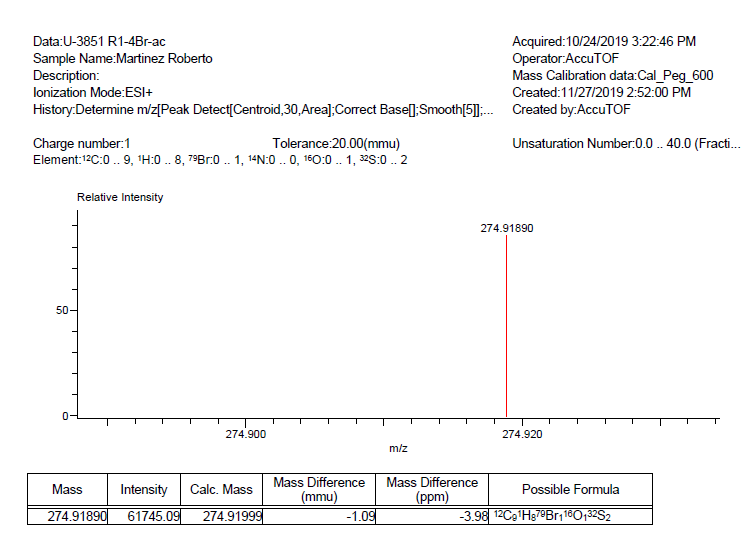


**Figure 36.** High Resolution Mass Spectra of (2Z)-3-(4-bromophenyl)-3-hydroxyprop-2-enedithioic acid **(11i)**


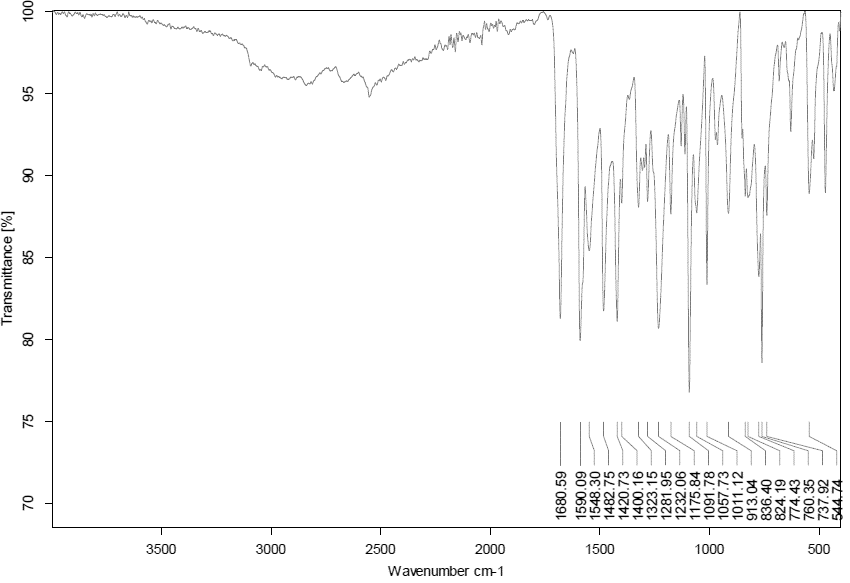


**Figure 37.** IR (ATR) spectra of (2Z)-3-(4-iodophenyl)-3-hydroxyprop-2-enedithioic acid **(11j)**

**Figure 38.** 1H NMR (300 MHz, CDCl3) of (2Z)-3-(4-iodophenyl)-3-hydroxyprop-2-enedithioic acid **(11j)**

**Figure 39.** 13C NMR (75 MHz, CDCl3) of (2Z)-3-(4-iodophenyl)-3-hydroxyprop-2-enedithioic acid **(11j)**


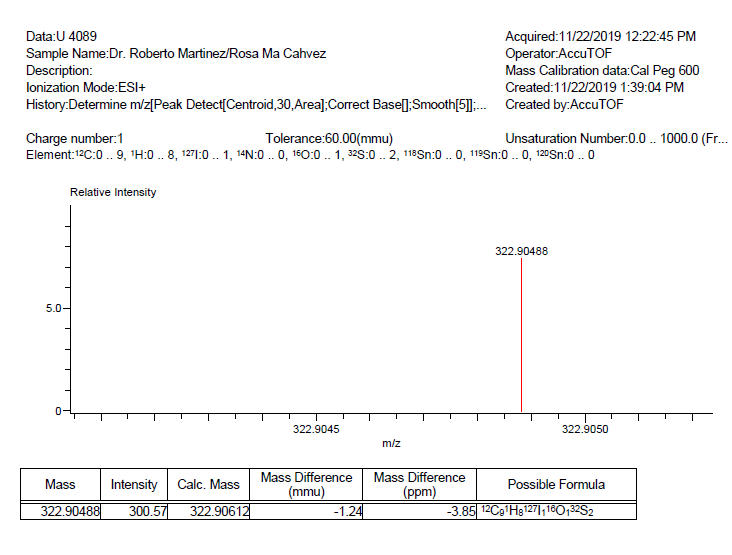


**Figure 40.** High Resolution Mass Spectra of (2Z)-3-(4-iodophenyl)-3-hydroxyprop-2-enedithioic acid **(11j)**
